# Supplementary material for: Alkene–azide chemistry: a facile, one-step, solvent- and catalyst-free approach for developing new functional monomers and polymers
Source: Royal Society of Chemistry journal article supplement (doi:10.1039/d0py00346h), 2020-01-01
Supplement: d0py00346h1.pdf [file d0py00346h1.pdf]

## Alkene-Azide Chemistry: A Facile, One-Step, Solvent- and Catalyst-Free Approach for Developing New Functional Monomers and Polymers

Santimukul Santra,<sup>a,\*</sup> Ren Bean,<sup>a,†</sup> Blaze Heckert,<sup>a,†</sup> Zachary Shaw,<sup>a</sup> Vedant Jain,<sup>a</sup> Lok Shrestha,<sup>a</sup> Raghunath Narayanam<sup>a</sup> and Quentin Austin<sup>a</sup>

<sup>a</sup> Department of Chemistry, Pittsburg State University, 1701 S Broadway Street, Pittsburg, KS 66762, USA.

\*Corresponding author: Santimukul Santra, Email: [ssantra@pittstate.edu](mailto:ssantra@pittstate.edu)

†Authors contributed equally.

**Keywords:** green chemistry, Huisgen 1,3-dipolar cycloaddition, click-ene chemistry, functional monomers, macromolecules

### Section 1: Characterization of functional monomers and polymers

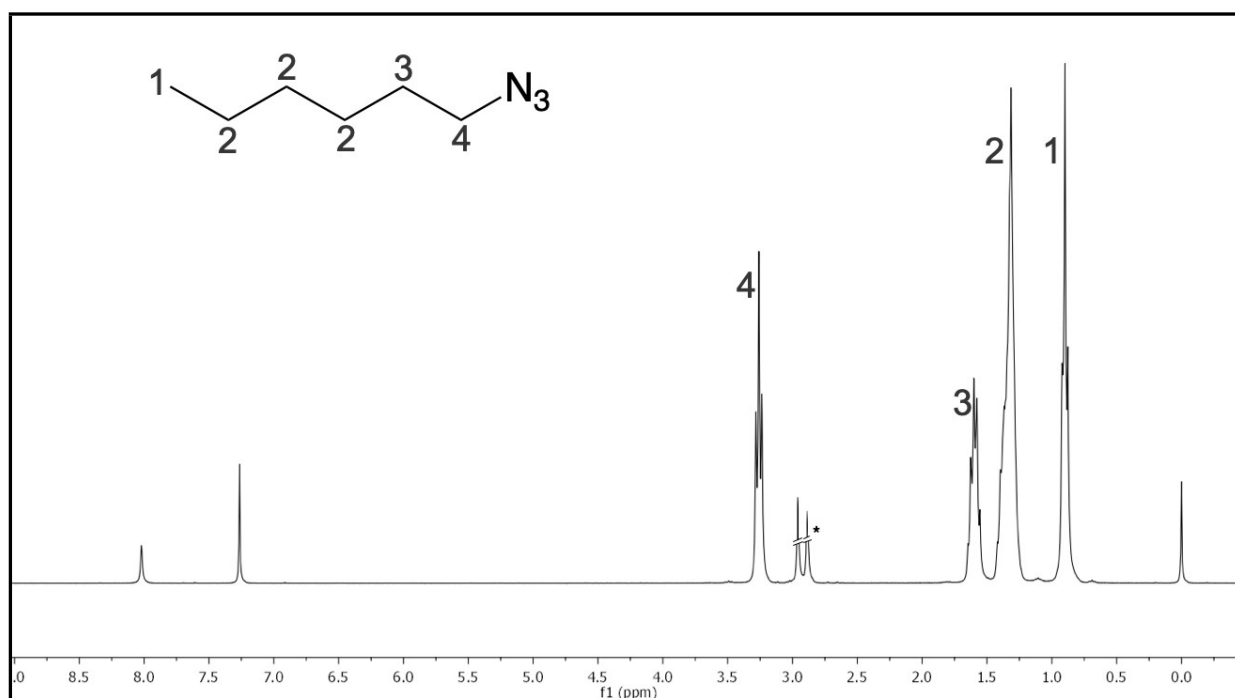

**Figure S1:** <sup>1</sup>H NMR spectrum of hexyl azide. Residual solvent peaks can be seen from 2.75 – 3.0 ppm and 8.0 ppm. Spectra was obtained in CDCl<sub>3</sub> (7.26 ppm). \*Residual solvent peaks were reduced to improve clarity of the spectrum.

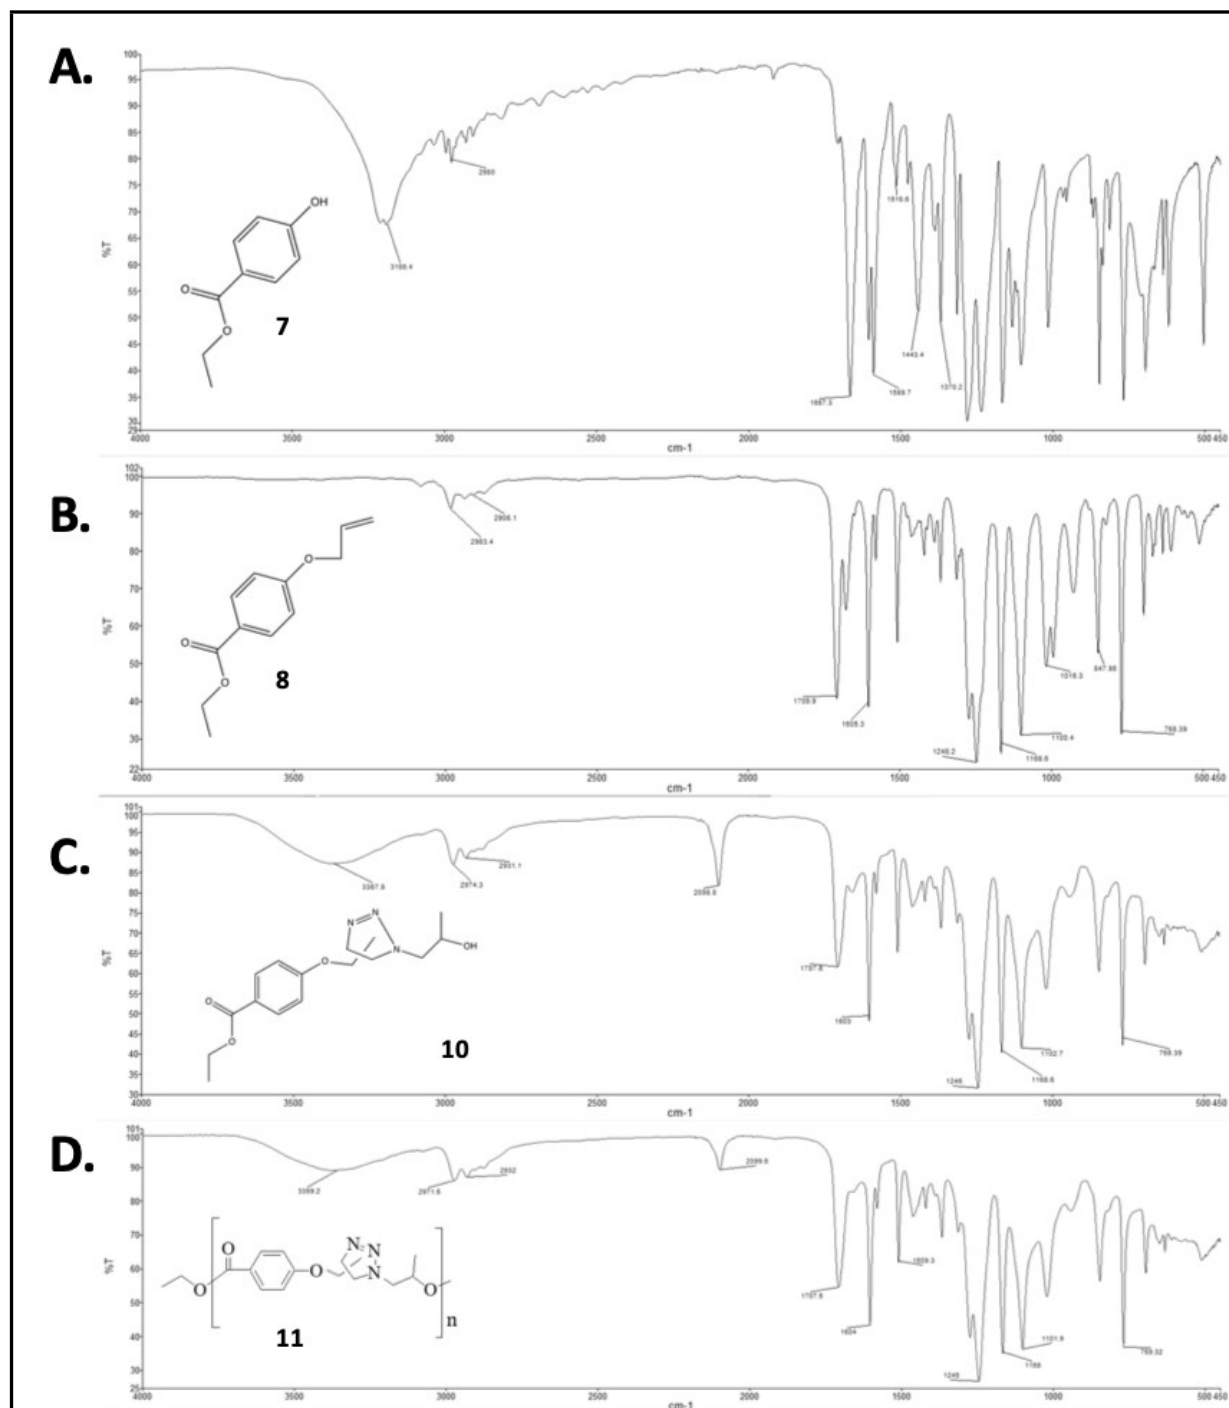

**Figure S2:** FT-IR spectra of **A)** starting material ethyl protected benzoic acid (**7**), **B)** subsequent vinyl functionalized starting material (**8**), **C)** "Click-ene" constructed monomer (**10**), and **D)** resulting polymer (**11**).

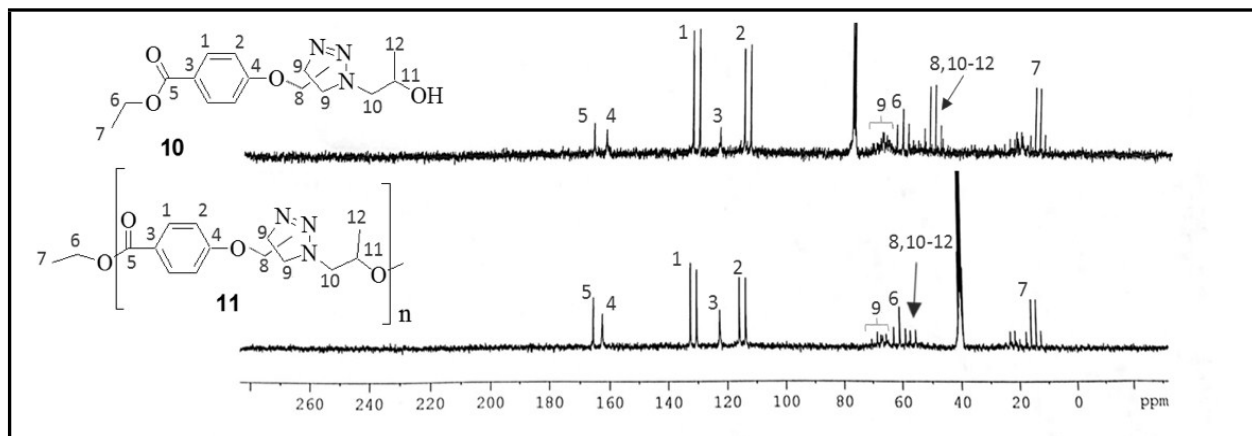

**Figure S3:**  $^{13}\text{C}$  NMR of ethyl protected benzoic acid (**7**), subsequent vinyl functionalized starting material (**8**), “Click-ene” constructed monomer (**10**), and resulting polyester polymer (**11**). Compound **10** spectra was obtained in  $\text{CDCl}_3$  (77.16 ppm) and polymer **11** was obtained in  $\text{DMSO-d}_6$  (39.52 ppm).

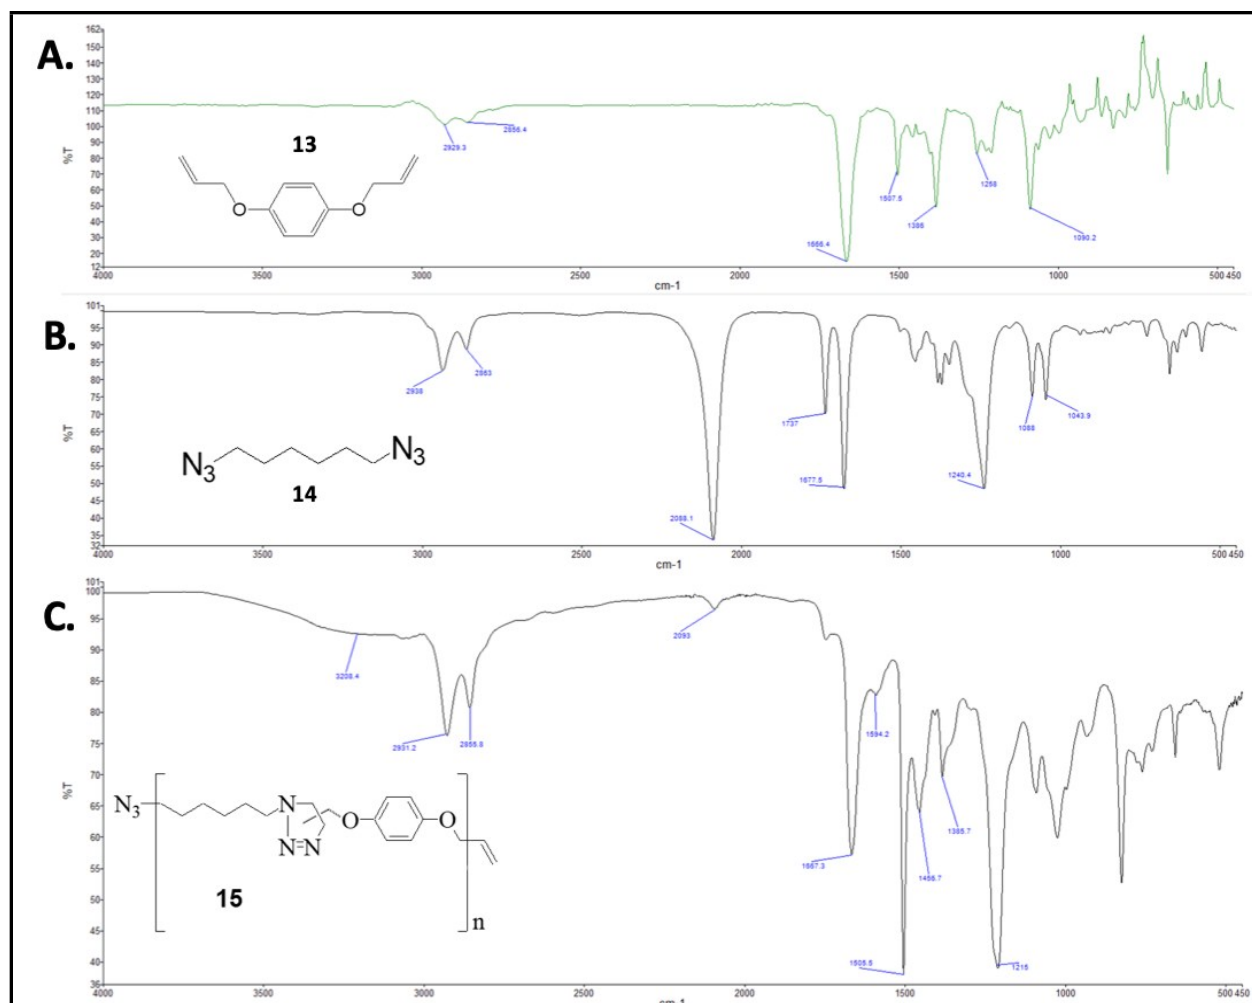

**Figure S4:** FT-IR spectra of **A)** aryl alkene (**13**), **B)** diazide starting material (**14**), and **C)** resulting “Click-ene” aryl polymer (**15**).

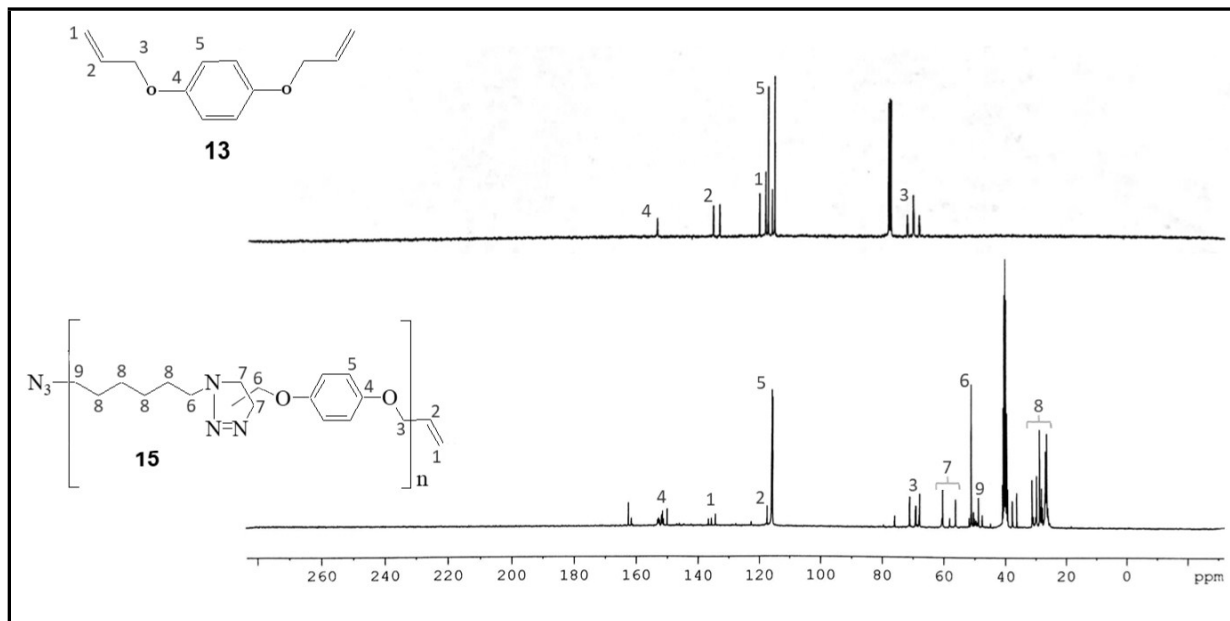

**Figure S5:**  $^{13}\text{C}$  NMR of the aryl alkene (**13**) and resulting "Click-ene" polymer (**15**). Compound **13** spectra was obtained in  $\text{CDCl}_3$  (77.16 ppm) and polymer **15** was obtained in  $\text{DMSO-d}_6$  (39.52 ppm).

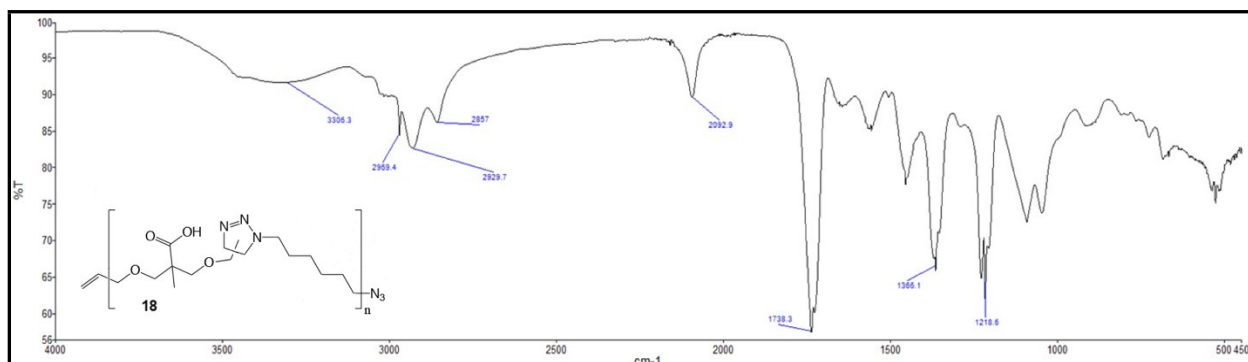

**Figure S6:** FT-IR spectra of the aliphatic "Click-ene" polymer (**18**).

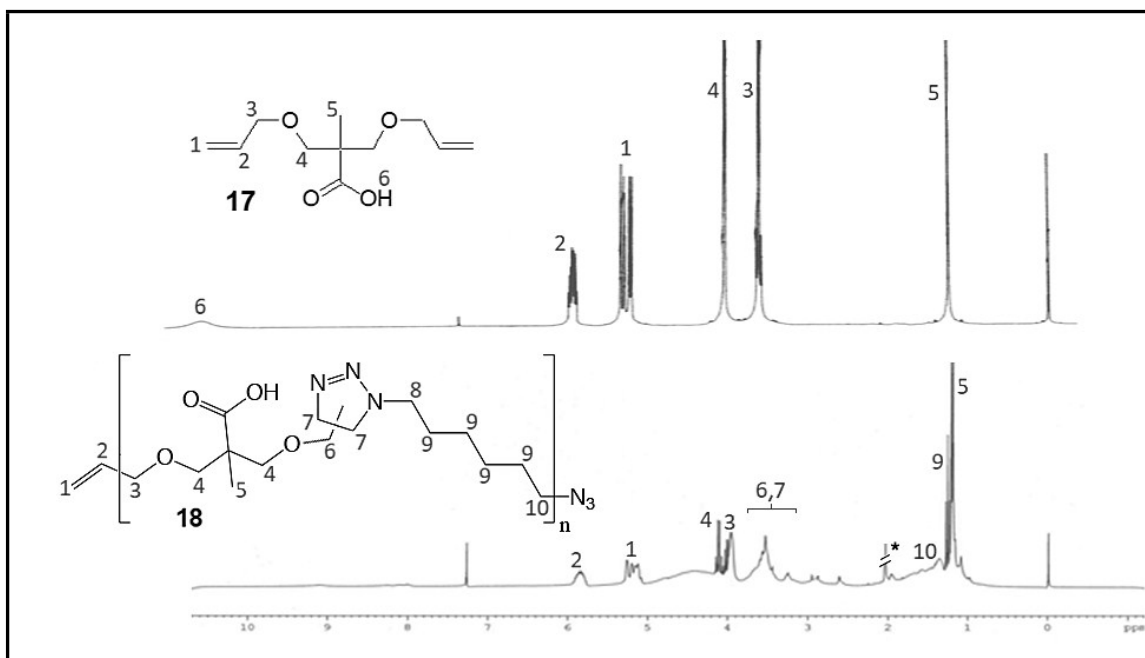

**Figure S7:**  $^1\text{H}$  NMR of the aliphatic alkene (**17**) and resulting "Click-ene" aliphatic polymer (**18**). Both spectra were obtained in  $\text{CDCl}_3$  (7.26 ppm). A residual solvent peak (acetone) can be seen at 2.1 ppm. \*Residual solvent peak was reduced to improve clarity of the spectrum.

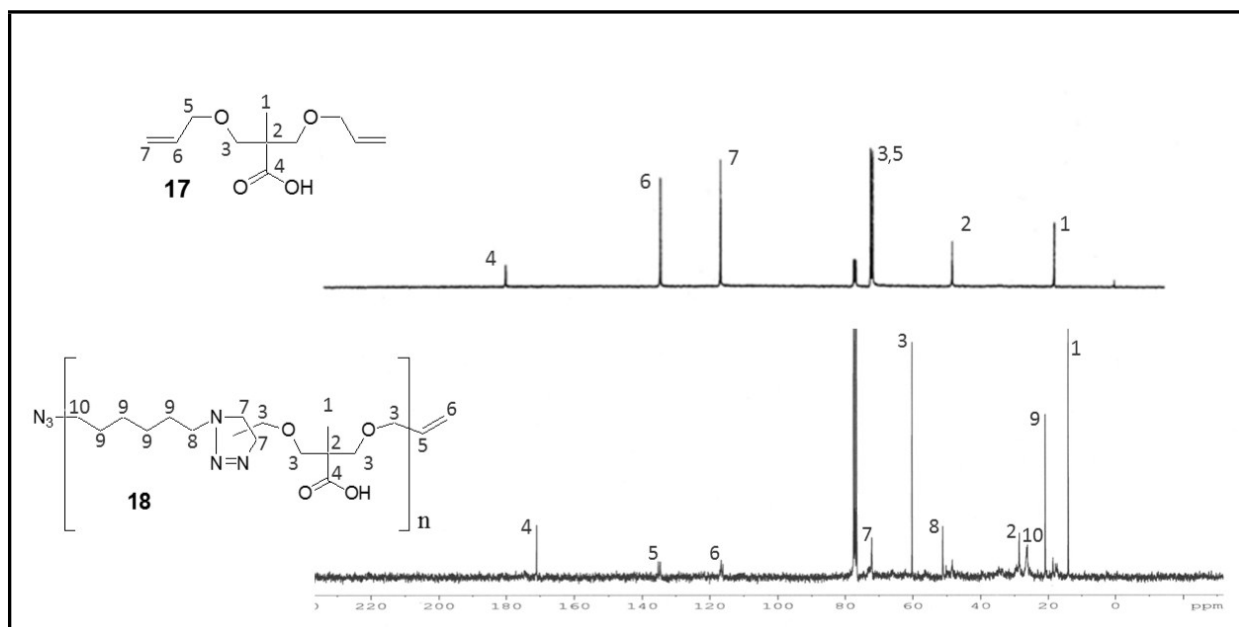

**Figure S8:**  $^{13}\text{C}$  NMR of the aliphatic alkene (**17**) and resulting "Click-ene" constructed polymer (**18**). Both spectra were obtained in  $\text{CDCl}_3$  (77.16 ppm).

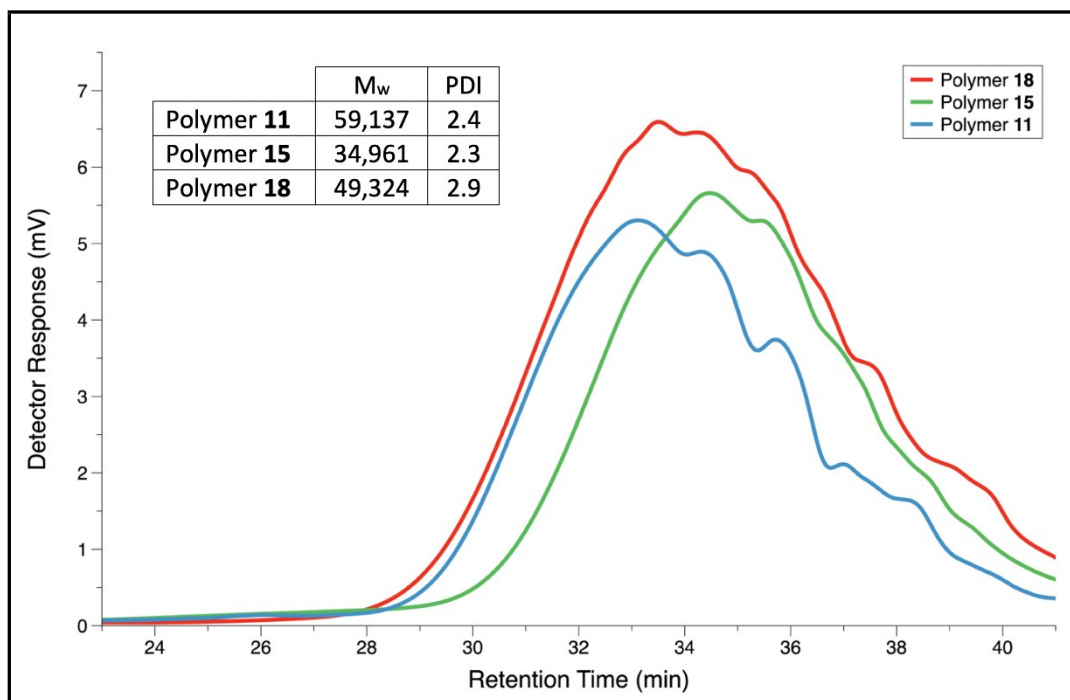

**Figure S9:** SEC of “Click-ene” based polymers and **Table S1** (inset) showing weight average molecular weight (M<sub>w</sub>) and PDI from SEC.

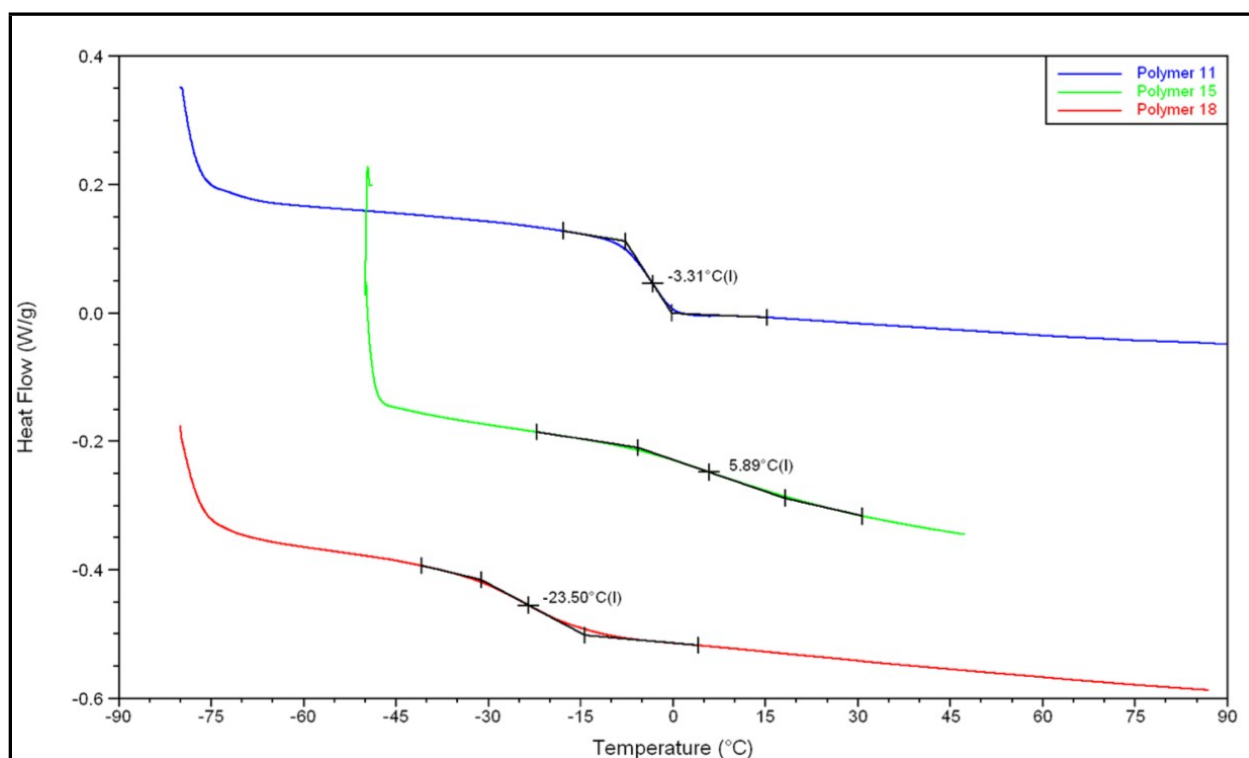

**Figure S10:** DSC of “Click-ene” based polymers.

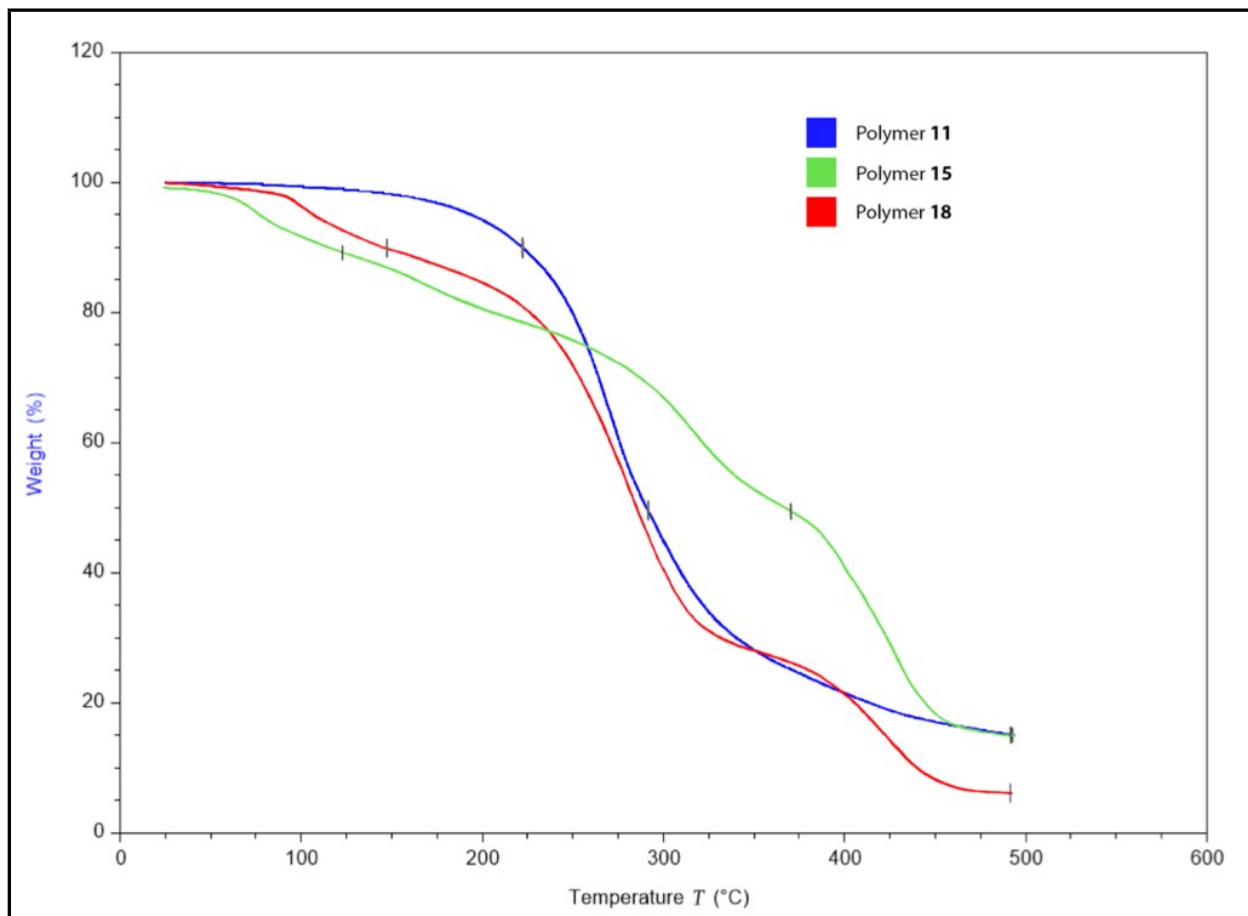

**Figure S11:** TGA of "Click-ene" based polymers.
